# Supplementary material for: Inhibition of Heat Shock proteins HSP90 and HSP70 induce oxidative stress, suppressing cotton fiber development
Source: PubMed Central journal article supplement (PMC5827756; doi:10.1038/s41598-018-21866-0), 2018-02-26
Supplement: 41598_2018_21866_MOESM1_ESM.pdf [file 41598_2018_21866_MOESM1_ESM.pdf]

**Inhibition of Heat Shock proteins *HSP90* and *HSP70* induce oxidative stress and suppress cotton fiber development**

**Anshulika Sable<sup>1,4</sup>, Krishan M. Rai<sup>1,2</sup>, Amit Choudhary<sup>1</sup>, Vikash K. Yadav<sup>1,3</sup>, Sudhir K. Agarwal<sup>4</sup>, Samir V. Sawant<sup>1\*</sup>**

**The affiliations and addresses of the authors:**

<sup>1</sup>Plant Molecular Biology Laboratory, National Botanical Research Institute, Rana Pratap Marg, Lucknow 226001, India

<sup>2</sup>Present address: Department of Plant and Soil Science, Texas Tech University, Lubbock, Texas 79415, USA

<sup>3</sup>Present address: Department of Plant Biology, Uppsala Biocenter, Swedish University of Agricultural Sciences, Uppsala 75007, Sweden

<sup>4</sup>Department of Biochemistry, University of Lucknow, Lucknow 226007, India

**Supplementary Information**

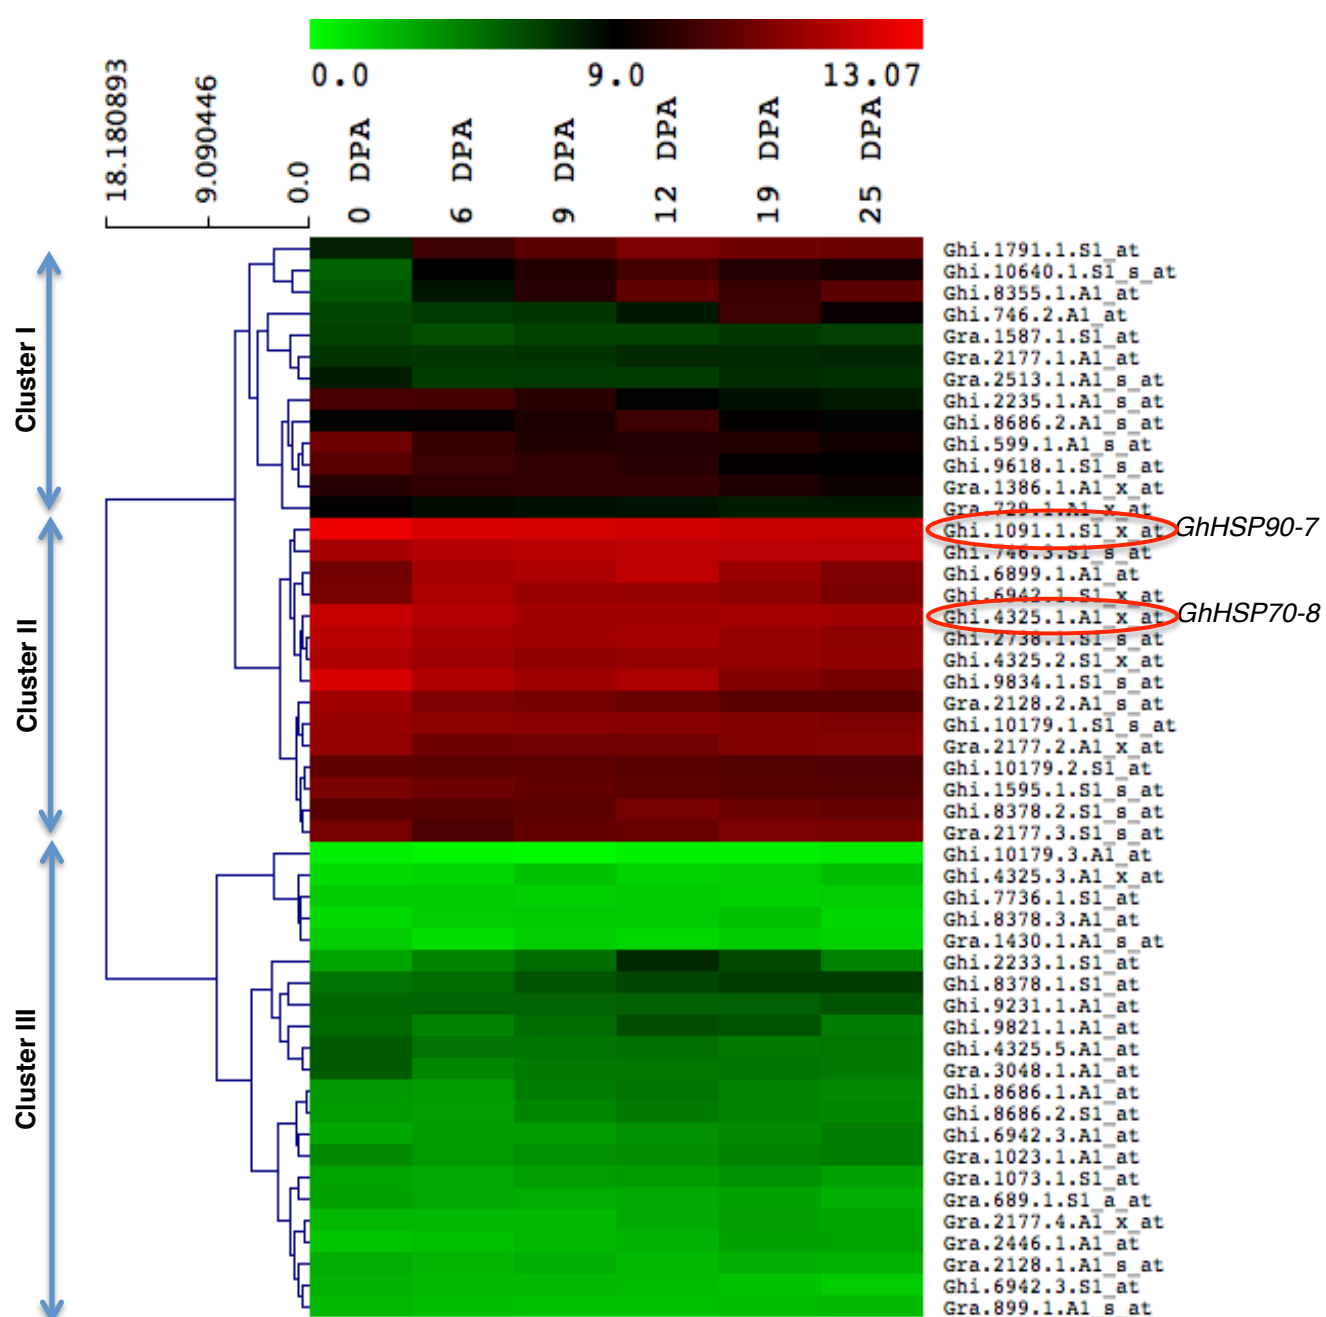

**Supplementary Fig. S1. Microarray gene expression profile of HSPs in different stages of fiber development in *G. hirsutum* genotypes.** Average transcript level of HSP genes at 0, 6, 9, 12, 19 and 25 DPA in five *G. hirsutum* genotypes. HSPs form medium expressing (Cluster I), high expressing (Cluster II) and low expressing (Cluster III) clusters.

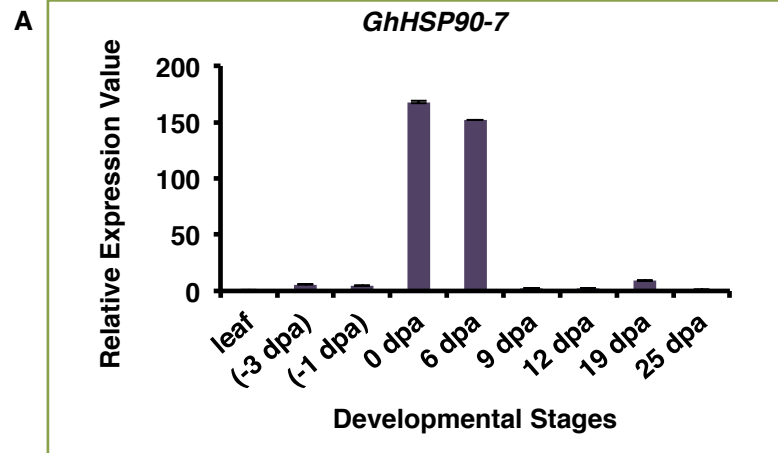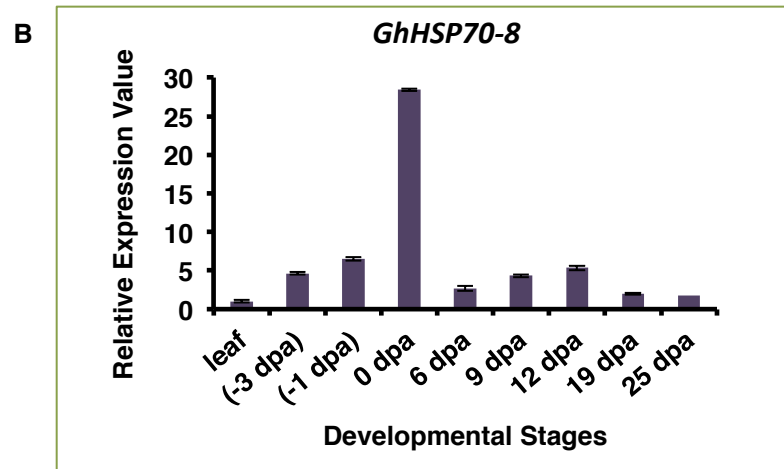

Supplementary Fig. S2. Real time PCR of candidate *GhHSP90-7* and *GhHSP70-8* genes at different fiber developmental stages. (A) *GhHSP90-7* (B) *GhHSP70-8*.

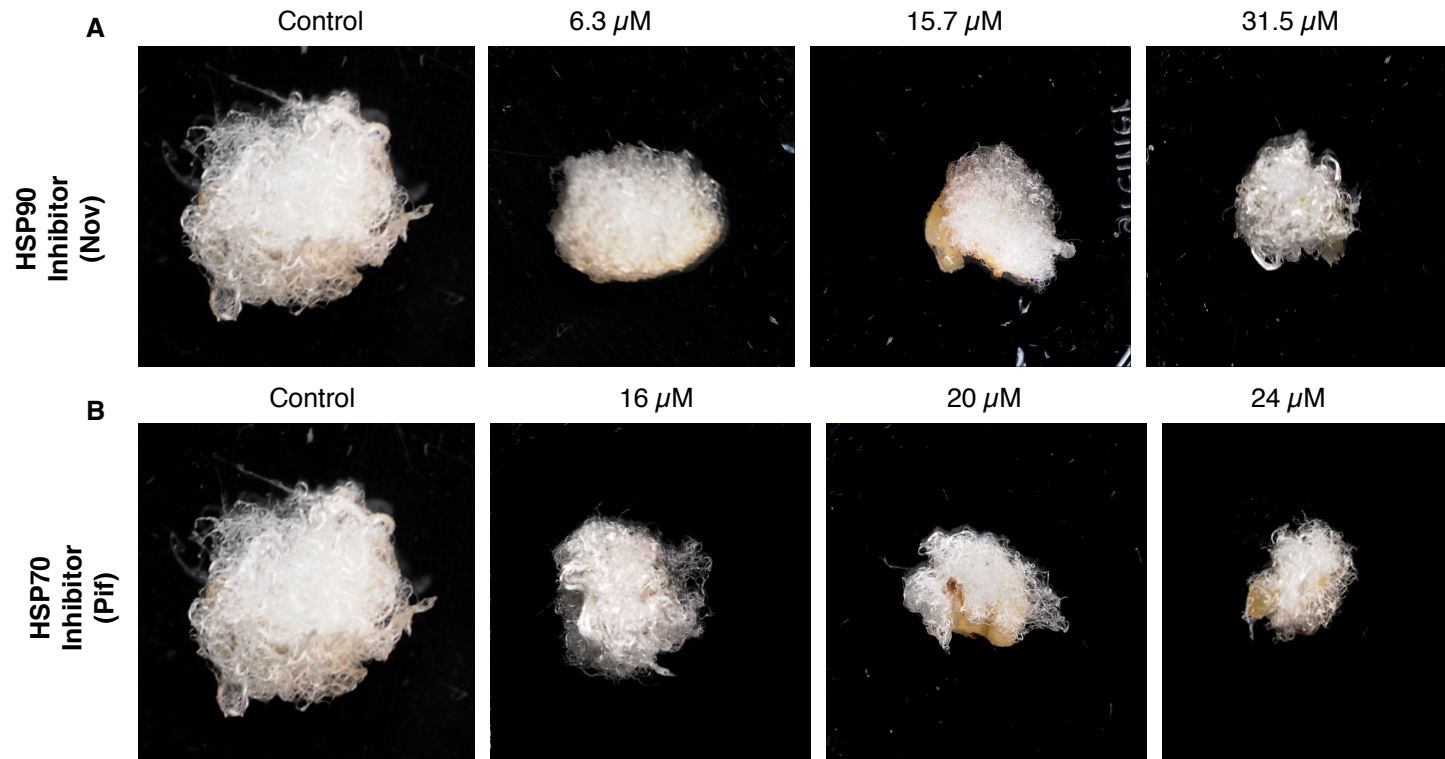

**Supplementary Fig. S3. Phenotypic analysis of fiber development at different inhibitor concentrations in *in-vitro* ovule culture. (A) Photographs showing effect of increasing concentrations of Nov (HSP90 inhibitor) in *in-vitro* ovule culture. (B) Photographs showing effect of increasing concentrations of Pif (HSP70 inhibitor) in *in-vitro* ovule culture.**

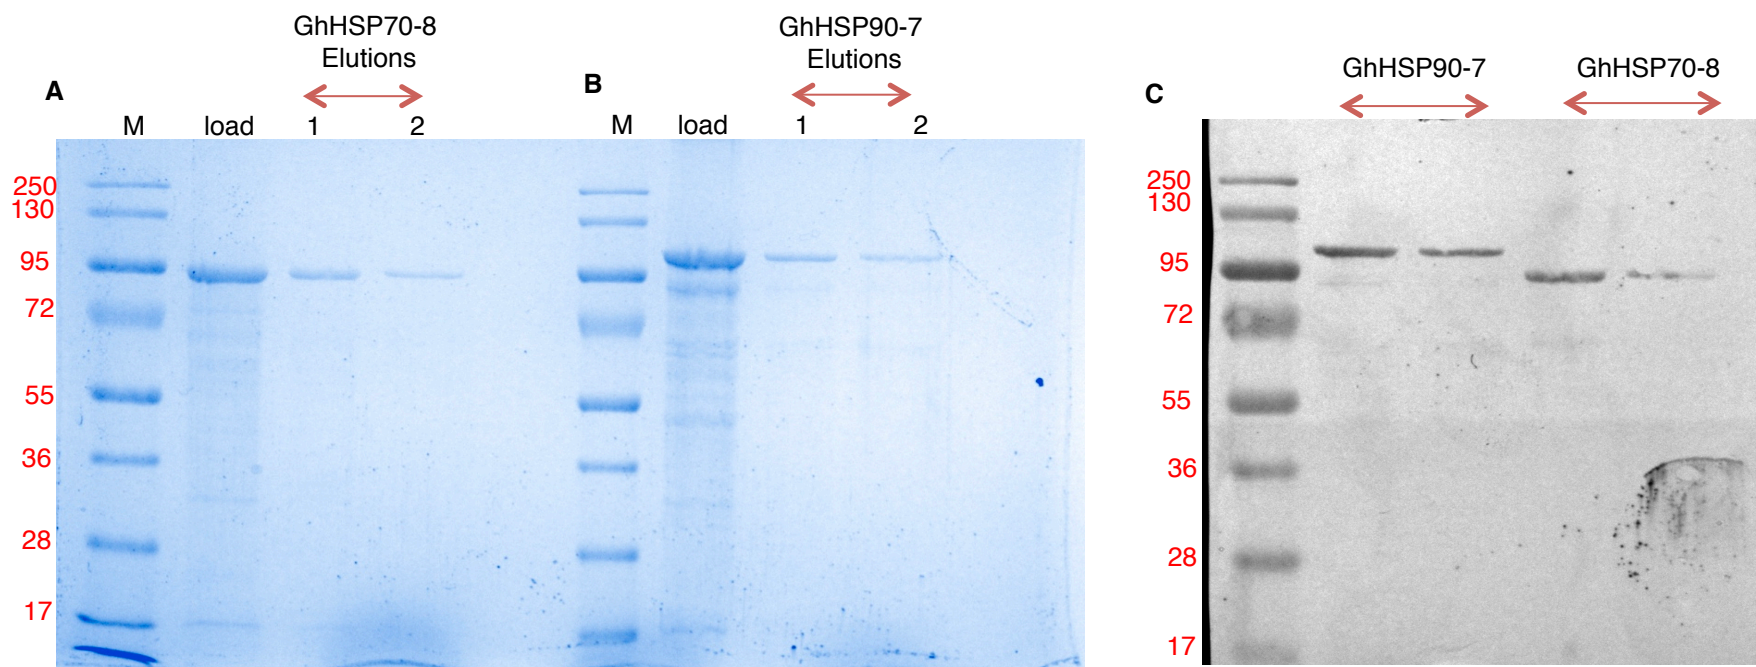

**Supplementary Fig. S4. Ni-NTA column purification and immunoblot of bacterial expressed recombinant GhHSP90-7 and GhHSP70-8.** (A) SDS-PAGE gel showing bacterially expressed and purified fractions of GhHSP90-7 (B) SDS-PAGE gel showing bacterially expressed and purified fractions of GhHSP70-8. (C) Immunoblot of GhHSP90-7 and GhHSP70-8 purified protein fractions with penta-His antibody.

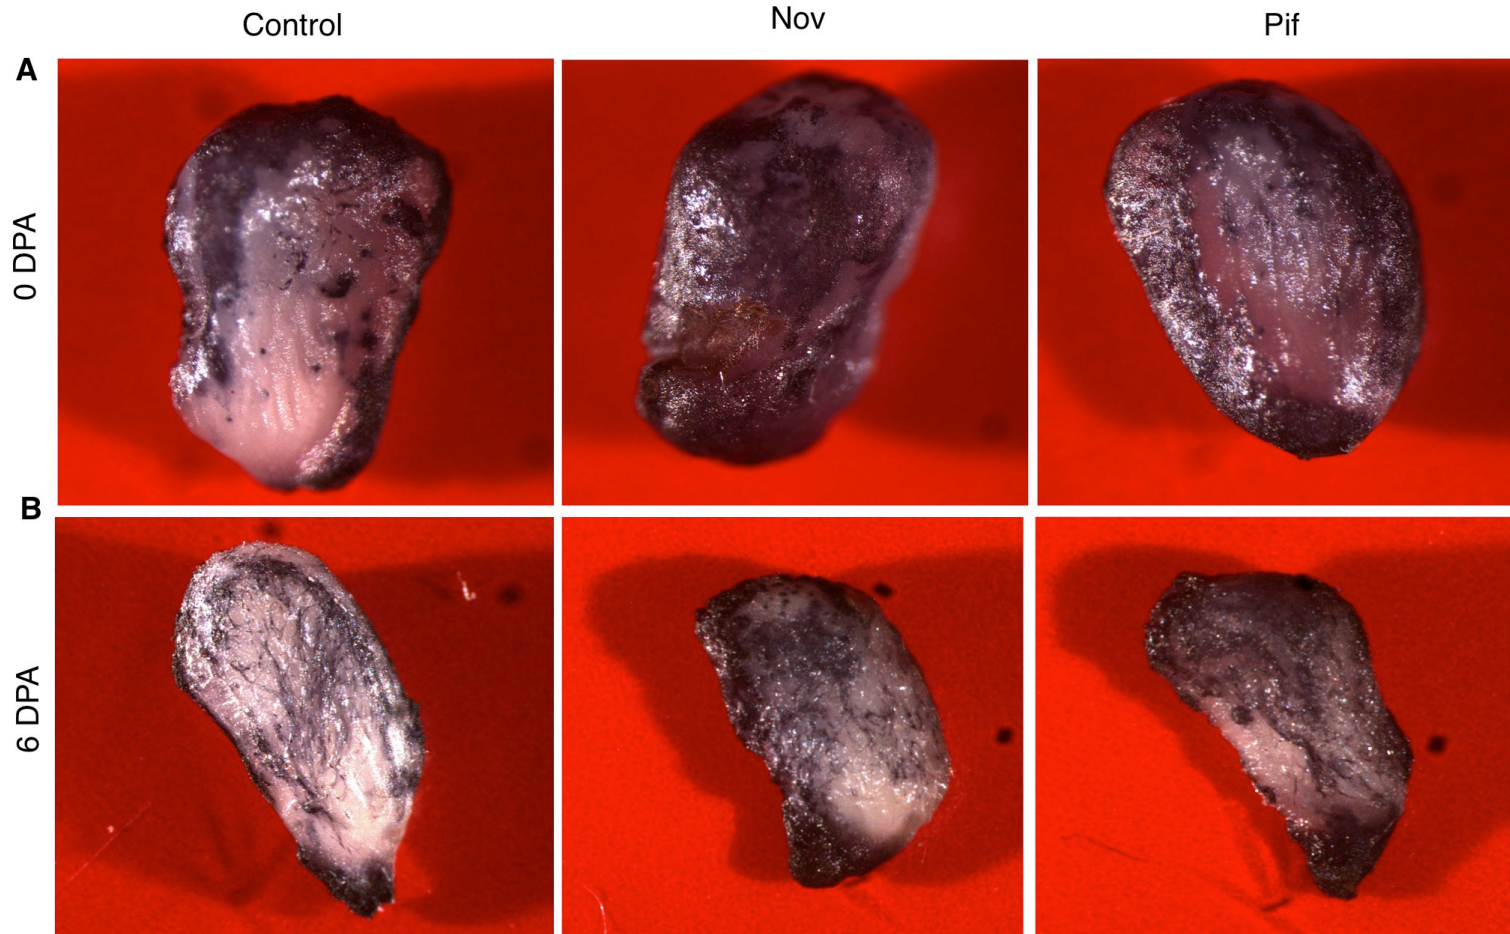

**Supplementary Fig. S5. Nitro-blue tetrazolium chloride (NBT) staining showing higher accumulation of superoxide in Nov and Pif treated ovules as compared to control (A) 0 DPA (B) 6 DPA.**

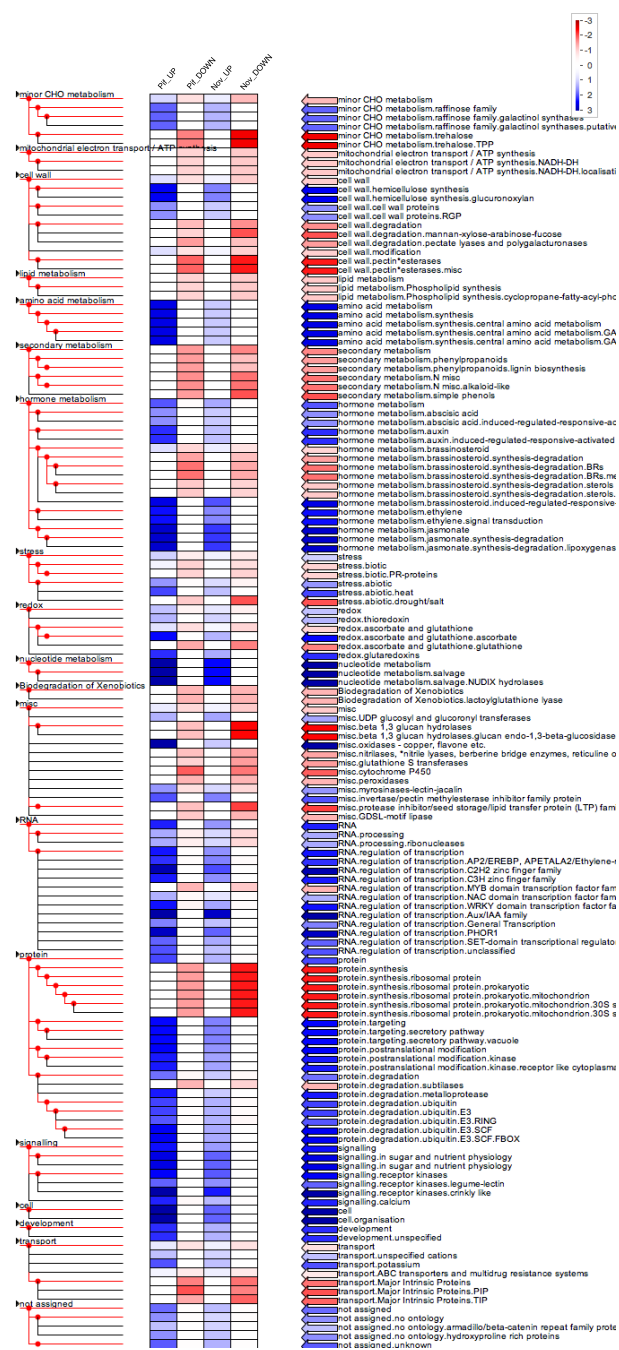

Supplementary Fig. S6. Pageman analysis of common DEGs in HSP90 (Nov) and HSP70 (Pif) inhibited ovules.

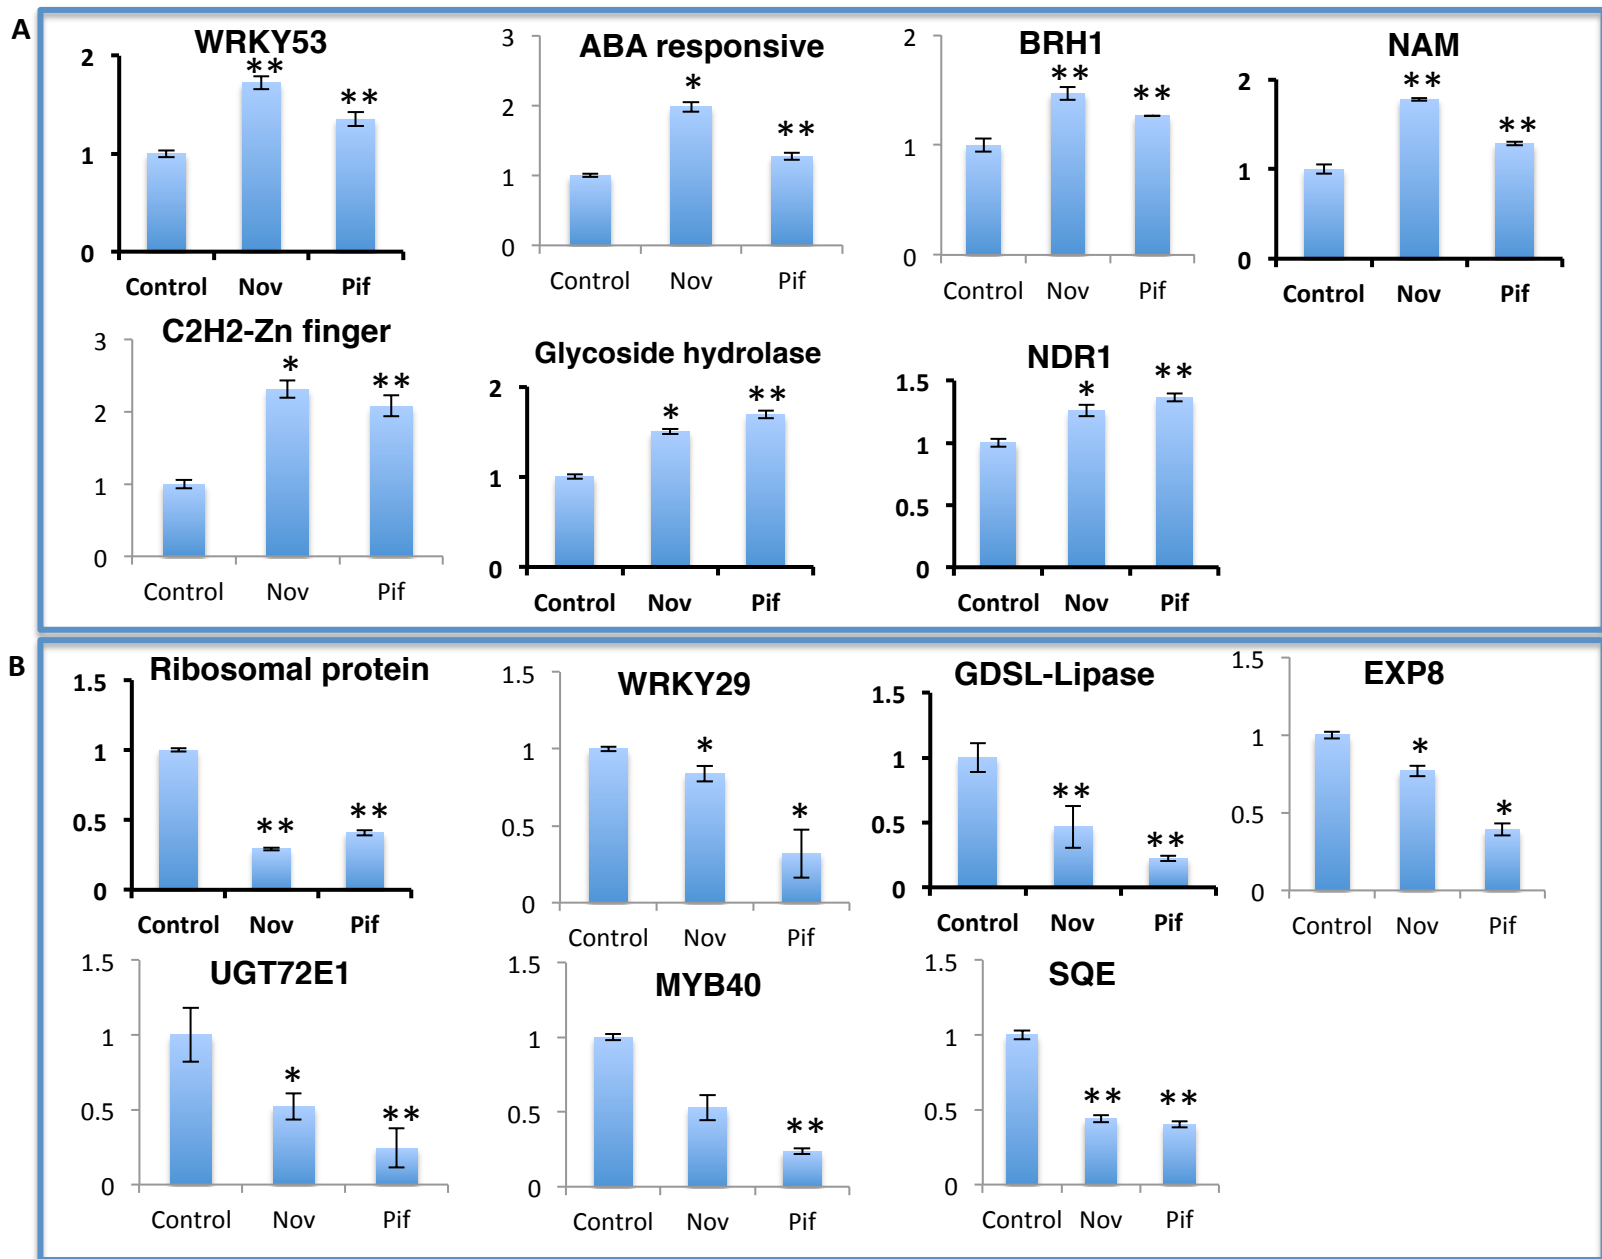

**Supplementary Fig. S7.** Quantitative real time PCR of randomly selected common DEGs from Nov and Pif treated ovules in three biological and three technical replicates (A) Up-regulated DEGs (B) Down-regulated DEGs. (y-axis denotes the fold-change; \*p-value  $\leq 0.05$ ; \*\*p-value  $\leq 0.01$ ).



## Supplementary Tables

**Supplementary Table S1.** List of publically available cotton fiber transcriptome datasets used for transcript level analysis.

| <b>Dataset</b> | <b>Development stage</b> |
|----------------|--------------------------|
| SRX7697907     | -3 DPA                   |
| SRX7697908     | -1 DPA                   |
| SRX7697909     | 0 DPA                    |
| SRX7697910     | 1 DPA                    |
| SRX7697911     | 3 DPA                    |
| SRX7697917     | 5 DPA                    |
| SRX7697918     | 10 DPA                   |
| SRX7697919     | 20 DPA                   |
| SRX7697920     | 25 DPA                   |

**Supplementary Table S2.** Transcriptome analysis of inhibitor treated ovules at elongation stage.

| <b>Sample_Id</b> | <b>Total_reads</b> | <b>Reads_Aligned</b> | <b>%_Reads_Alignment</b> |
|------------------|--------------------|----------------------|--------------------------|
| Control-1        | 39173030           | 31022206             | 79.2%                    |
| Control-2        | 28424260           | 22542512             | 79.3%                    |
| Pif-1            | 24184514           | 19284706             | 79.7%                    |
| Pif-2            | 28499642           | 22692875             | 79.6%                    |
| Nov-1            | 30231882           | 24151456             | 79.9%                    |
| Nov-2            | 26129174           | 20786511             | 79.6%                    |

**Supplementary Table S3.** Allelic contribution of DEGs in transcriptome.

|                    | <b>HSP90</b>  |                 | <b>HSP70</b>  |                 |
|--------------------|---------------|-----------------|---------------|-----------------|
|                    | <b>Up (%)</b> | <b>Down (%)</b> | <b>Up (%)</b> | <b>Down (%)</b> |
| <b>A-subgenome</b> | 33.019        | 28.959          | 32.432        | 29.682          |
| <b>D-subgenome</b> | 45.283        | 45.023          | 44.906        | 39.929          |
| <b>Scaffold</b>    | 21.698        | 26.018          | 22.661        | 30.389          |

**Supplementary Table S4.** Primers used in this study.

| S. No.                                                 | Primer name                  | Sequence (5'—3')               |
|--------------------------------------------------------|------------------------------|--------------------------------|
| <b>A. For cloning into bacterial expression vector</b> |                              |                                |
| 1                                                      | <i>GhHSP90-7_F</i>           | ATGGCGGATACTGAGACGTTTGC        |
| 2                                                      | <i>GhHSP90-7_R</i>           | TTAATCAACTTCCTCCATCTTGCTG      |
| 3                                                      | <i>GhHSP70-8_F</i>           | ATGGCCGGAAAAGGAGAAGGAC         |
| 4                                                      | <i>GhHSP70-8_R</i>           | TTAGTCGACTTCTTCTATCTTAGGTCCAGC |
| <b>B. For Real time PCR</b>                            |                              |                                |
| 5                                                      | <i>WRKY53_F</i>              | GCAGCCCTCGGAGTGATGA            |
| 6                                                      | <i>WRKY53_R</i>              | ACTCTCACATGATCCGTCCATCTC       |
| 7                                                      | <i>ABA responsive_F</i>      | ATTGTGACAGTGGATGGACATGATT      |
| 8                                                      | <i>ABA responsive_R</i>      | TTGCTACAGAACTGGAAACACTCTCA     |
| 9                                                      | <i>BRH1_F</i>                | CCGCTGGATGGATCACGAT            |
| 10                                                     | <i>BRH1_R</i>                | TAAACTCAGCTTGCATCTCATCAGGTA    |
| 11                                                     | <i>NAM_F</i>                 | GGGAGGAAAACCAAATGGAAGA         |
| 12                                                     | <i>NAM_R</i>                 | TCAACTTAGGAGGAGCAGACACATATG    |
| 13                                                     | <i>C2H2 Zn-finger_F</i>      | TCCATTTGCGGCCAAGAGTT           |
| 14                                                     | <i>C2H2 Zn-finger_R</i>      | ACAAGCGGAAACGGTGAGAAG          |
| 15                                                     | <i>Glycoside hydrolase_F</i> | CCGTGGATGATACACCCATTAGAG       |
| 16                                                     | <i>Glycoside hydrolase_R</i> | TAAATTCTCATGGGCTGGTTCTTG       |
| 17                                                     | <i>NDR1_F</i>                | CCAAACGATACTACCTTAAACCTGACCTT  |
| 18                                                     | <i>NDR1_R</i>                | GCGACTTTCACAGCATCATACTTAATC    |
| 19                                                     | <i>Ribosomal protein_F</i>   | CCGAAGAAATGGTAAGATATGGGTAAG    |
| 20                                                     | <i>Ribosomal protein_R</i>   | GATTCCTTCCCTCTTCCCATTC         |
| 21                                                     | <i>WRKY29_F</i>              | CATGTTGATGAACCAGCAGAGAAA       |
| 22                                                     | <i>WRKY29_R</i>              | TGCTCTACCACTCTATTCTGCTGATTC    |
| 23                                                     | <i>GDSL-lipase_F</i>         | GGATGTGCGCCGAAGGA              |
| 24                                                     | <i>GDSL-lipase_R</i>         | GTTGTGGACGCGGAAGCAT            |
| 25                                                     | <i>EXP8_F</i>                | ATGGTGGCTGGTGCAATCCT           |
| 26                                                     | <i>EXP8_R</i>                | AGCCCGGTACTGAGCAATTTG          |
| 27                                                     | <i>UGT72E1_F</i>             | GGTGCTCGAACTCGGAAAAAGA         |
| 28                                                     | <i>UGT72E1_R</i>             | CAGGAGTTGGGATCGAGACAAA         |
| 29                                                     | <i>MYB40_F</i>               | ACCGTGGACGATCGAGGAA            |
| 30                                                     | <i>MYB40_R</i>               | CCACACCTTAACAACCCTGCAA         |
| 31                                                     | <i>SQE1_F</i>                | ATGGACGTCGAGTGCAAGTGA          |
| 32                                                     | <i>SQE1_R</i>                | GCCCCCTGGTTGTAGCAATTC          |
| 33                                                     | <i>GbUbiQ1_F</i>             | AGCTCGGATACGATTGATAACG         |
| 34                                                     | <i>GbUbiQ1_R</i>             | GAAGACGAAGAACAAGGGGAAG         |
| 35                                                     | <i>Histone3_F</i>            | TCAAGACTGATTGCGTTTCCA          |
| 36                                                     | <i>Histone3_R</i>            | GCGCAAAGGTTGGTGTCTTC           |
